# Supplementary material for: Instantaneous neural processing of communicative functions conveyed by speech prosody
Source: PubMed Central journal article supplement (PMC9626830; doi:10.1093/cercor/bhab522), 2022-02-08
Supplement: prosa_supplementarymaterial_bhab522.pdf [file prosa_supplementarymaterial_bhab522.pdf]

## Supplementary material

# Instantaneous neural processing of communicative functions conveyed by speech prosody

**Rosario Tomasello<sup>1,2\*</sup>, Luigi Grisoni<sup>1,2</sup>, Isabella Boux<sup>1,3,4</sup> Daniela Sammler<sup>5</sup> and Friedemann Pulvermüller<sup>1,2,3,4</sup>**

<sup>1</sup> Brain Language Laboratory, Department of Philosophy and Humanities, WE4  
Freie Universität Berlin  
14195 Berlin,  
Germany

<sup>2</sup> Cluster of Excellence 'Matters of Activity. Image Space Material', Humboldt Universität zu Berlin  
10099 Berlin,  
Germany

<sup>3</sup> Berlin School of Mind and Brain, Humboldt Universität zu Berlin  
10117 Berlin,  
Germany

<sup>4</sup> Einstein Center for Neurosciences  
10117 Berlin,  
Germany

<sup>5</sup> Research Group 'Neurocognition of Music and Language', Max Planck Institute for Empirical Aesthetics,  
60322 Frankfurt/M.,  
Germany

\*Corresponding author. Address for correspondence:

Brain Language Laboratory  
Department of Philosophy and Humanities, WE4  
Freie Universität Berlin  
Habelschwerdter Allee 45  
14195 Berlin, Germany  
Tel.: +49 (0) 30 838 51984  
Tomasello.R@fu-berlin.de  
ORCID: 0000-0001-8414-2644

## Supplementary material

|                          | Spoken sentence (communicative action) |            |               |            |                |          |
|--------------------------|----------------------------------------|------------|---------------|------------|----------------|----------|
|                          | Rising Pitch                           |            | Falling Pitch |            | <i>Z-value</i> | <i>p</i> |
|                          | <i>Mean</i>                            | <i>SEM</i> | <i>Mean</i>   | <i>SEM</i> |                |          |
| RMS (dB, intensity)      | 69.43                                  | 0.72       | 69.30         | 0.62       | 0.2313         | 0.817    |
| Pitch F0 (Hz)            | 250.07                                 | 5.84       | 178.10        | 3.40       | 5.118          | <0.001   |
| Low-pass Filtered signal |                                        |            |               |            |                |          |
| RMS (dB, intensity)      | 72.09                                  | 0.60       | 72.09         | 0.66       | 1.076          | 0.281    |
| Pitch F0 (Hz)            | 235.79                                 | 5.45       | 172.15        | 3.21       | 5.256          | <0.001   |
| Non-vocal sound          |                                        |            |               |            |                |          |
| RMS (dB, intensity)      | 65.24                                  | 0.054      | 65.41         | 0.042      | 2.109          | 0.034    |
| Pitch F0 (Hz)            | 221.06                                 | 4.27       | 200.059       | 3.08       | 3.161          | <0.001   |

**Table S1: Statistical comparison of the mean acoustic features on the EEG time window 68-118ms where significant neurophysiological differences were found.** Note that the marginally significant difference in RMS (dB, intensity) in the non-vocal sound condition is due to the small variance within the stimuli (see the near-identical values of the mean and *SEM*).
